# Supplementary material
Source: Springer Nature journal article supplement (https://www.springermedizin.de/resource/supplementary/12872_2014_755_MOESM2_ESM.pdf/9430426)
Supplement: MOESM2 [file 9430426]

24220920130216

POLICLINICO CATANIA

S8-3/ecocardio PEDI

FR 61Hz  
10cm

2D  
74%  
C 45  
P Off  
Ris

- ✦ Dist 0.350 cm
- ✕ Dist 0.192 cm
- ⊗ Dist 0.063 cm
- ⊗ Dist 0.055 cm

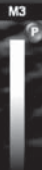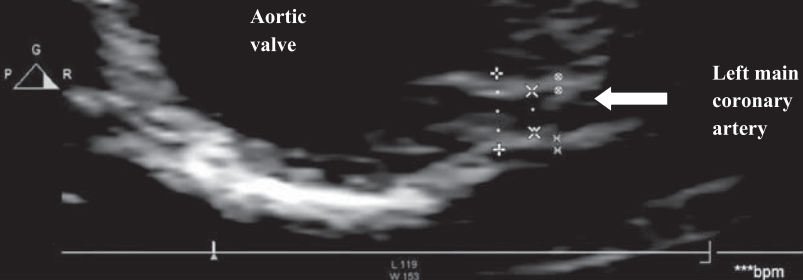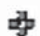

External diameter

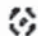

Superior thickening

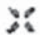

Internal diameter

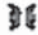

Inferior thickening
